# Supplementary material for: AI Paradox in Higher Education: Understanding Over-Reliance, Its Impact, and Sustainable Integration
Source: Research Square preprint supplement (doi:10.21203/rs.3.rs-6127885/v1), 2025-04-15
Supplement: Supplementary file 1 [file e5b57782221e5f13b1cd517a.docx]

Appendixes

Appendix A

Interview questions

Can you describe your experience with AI tools in your teaching, research, or administrative tasks?

What factors influenced your decision to start using AI in your academic work?

How do you determine when to use AI tools and when to rely on your own expertise?

In what ways, if any, has AI influenced your teaching practices and interactions with students?

Have you experienced any challenges or concerns related to your use of AI in education? If so, what are they?

How do you evaluate the accuracy and reliability of AI-generated content before incorporating it into your work?

To what extent do you feel that AI has impacted your professional identity and autonomy as an educator?

Have you noticed any changes in your decision-making or problem-solving approaches since integrating AI into your work?

How do you perceive the role of AI in shaping creativity and innovation in teaching and assessment?

Have institutional policies or expectations influenced the way you use AI in your academic work? If so, how?

How do you balance AI use with traditional teaching methods to ensure meaningful learning experiences for students?

Have you developed any strategies to manage your reliance on AI tools? If so, can you describe them?

What do you believe are the potential long-term effects of AI use on educators' professional roles and responsibilities?

What kind of support or training do you think educators need to use AI effectively and responsibly?

Is there anything else you would like to share about your experiences or perspectives on AI use in higher education?

Tabl 2. Coding book for the reasons for AI dependancy

| Theme | Subtheme | Example Quotation |
| --- | --- | --- |
| Institutional Factors | Heavy Workload and Time Constraints | AI helps me save time, especially for grading and administrative tasks. Without it, I would be overwhelmed. |
| Institutional expectation of using AI | "Our university expects us to use AI, but there’s little guidance on how to do it effectively." |
| Lack of Institutional Guidance | There are no clear guidelines on AI use in our institution, so I end up relying on it more than I probably should. |
| Psychological Factors | Anxiety and Performance Pressure | I worry that if I don’t use AI, my teaching methods will become outdated compared to my colleagues. |
| Perfectionism and Fear of Errors | I use AI for generating content because I want everything to be perfect before presenting it to students. |
| Cognitive Factors | Cognitive Offloading | Sometimes, I let AI generate responses instead of thinking through problems myself—it’s just quicker and easier. |
| Loss of Pedagogical Creativity | AI-generated lesson plans make it easy, but I feel like I’m losing my creative touch in designing courses. |
| Technological Factors | Ease of Access and Automation | The convenience of AI makes it tempting to use for everything—I don’t even think about whether I should do it myself anymore. |
| Lack of AI Literacy | I don’t always understand how AI works, so I trust it more than I probably should. |
| Feeling Powerful and Capable | AI makes me feel more capable and in control of my workload. |
| Individual Factors | Academic Self-Efficacy | I feel more confident in my academic abilities when AI helps me complete tasks efficiently. |
| Individual Factors | Academic Reputation | Using AI-generated research summaries enhances my credibility and saves me time. |
| High Performance Expectations | There’s a lot of pressure to produce high-quality work, so I use AI to meet expectations. |
| Low Academic Confidence | I lack confidence in my academic writing, so I rely on AI to refine my work. |
| Lack of Scientific Research Engagement | I rarely engage in deep scientific research anymore because AI provides quick summaries and insights. |

| Theme | Subtheme | Example Quotation |
| --- | --- | --- |
| Cognitive and Professional Deskilling | Loss of Critical Thinking Skills | I used to critically analyze sources before including them in my research. Now, I just let AI summarize everything for me. |
| Weakening of Problem-Solving Abilities | Since I started using AI for generating content, I find it harder to structure my own arguments without AI’s help. |
| skill atrophy  Atrophy of Academic Skills and Increased Laziness | Diminishing Research and Writing Skills | I never thought I’d struggle to write a research paper, but now I can’t start without an AI-generated outline. |
| Over-Reliance on AI for Simple Tasks | I let AI draft my lecture notes, and I hardly modify them. It’s easier, but I feel like I’m doing less original work. |
| Procrastination and Loss of Work Discipline | Last-Minute Dependence on AI | I know I should plan my lessons earlier, but I always put it off because AI can generate everything quickly when I need it. |
| Decreased Motivation for Independent Work | AI makes tasks easier, so I don’t push myself to brainstorm or plan ahead as much as I used to. |
| Decline in Problem-Solving and Decision-Making Abilities | Reduced Ability to Synthesize Information | AI tools present everything in such a structured way that I struggle when I have to integrate diverse sources on my own. |
| Weakened Judgment and Analytical Skills | I find myself trusting AI-generated summaries too much. I rarely double-check references like I used to. |
| Erosion of Pedagogical Autonomy | Standardized Teaching Over Personalized Instruction | I used to customize my assignments to fit my students’ needs, but now I just use AI-generated ones. It feels generic. |
| Reduction in Active Engagement with Students | I rely on AI so much for grading that I sometimes feel disconnected from my students’ learning progress. |
| Psychological Dependence and Reduced Confidence | Decreased Confidence in Teaching and Research Abilities | If AI stopped working today, I’d feel completely lost. I’ve started doubting my ability to work without it. |
| Perceived Professional Inadequacy | AI makes me feel productive, but deep down, I wonder if I’m losing my ability to work independently. |
| Long-Term Impact on Higher Education | Homogenization of Knowledge Production | I see the same AI-generated content appearing in multiple research papers. It’s like originality is disappearing. |
| Weakened Academic Mentorship | Students don’t reach out to me as much anymore because they know AI is handling most of their feedback. It’s worrying. |
